# Supplementary material for: STAT3 overexpression promotes metastasis in intrahepatic cholangiocarcinoma and correlates negatively with surgical outcome
Source: PubMed Central journal article supplement (PMC5352354; doi:10.18632/oncotarget.13846), 2016-12-09
Supplement: oncotarget-08-7710-s001.pdf [file oncotarget-08-7710-s001.pdf]

## STAT3 overexpression promotes metastasis in intrahepatic cholangiocarcinoma and correlates negatively with surgical outcome

### Supplementary Materials

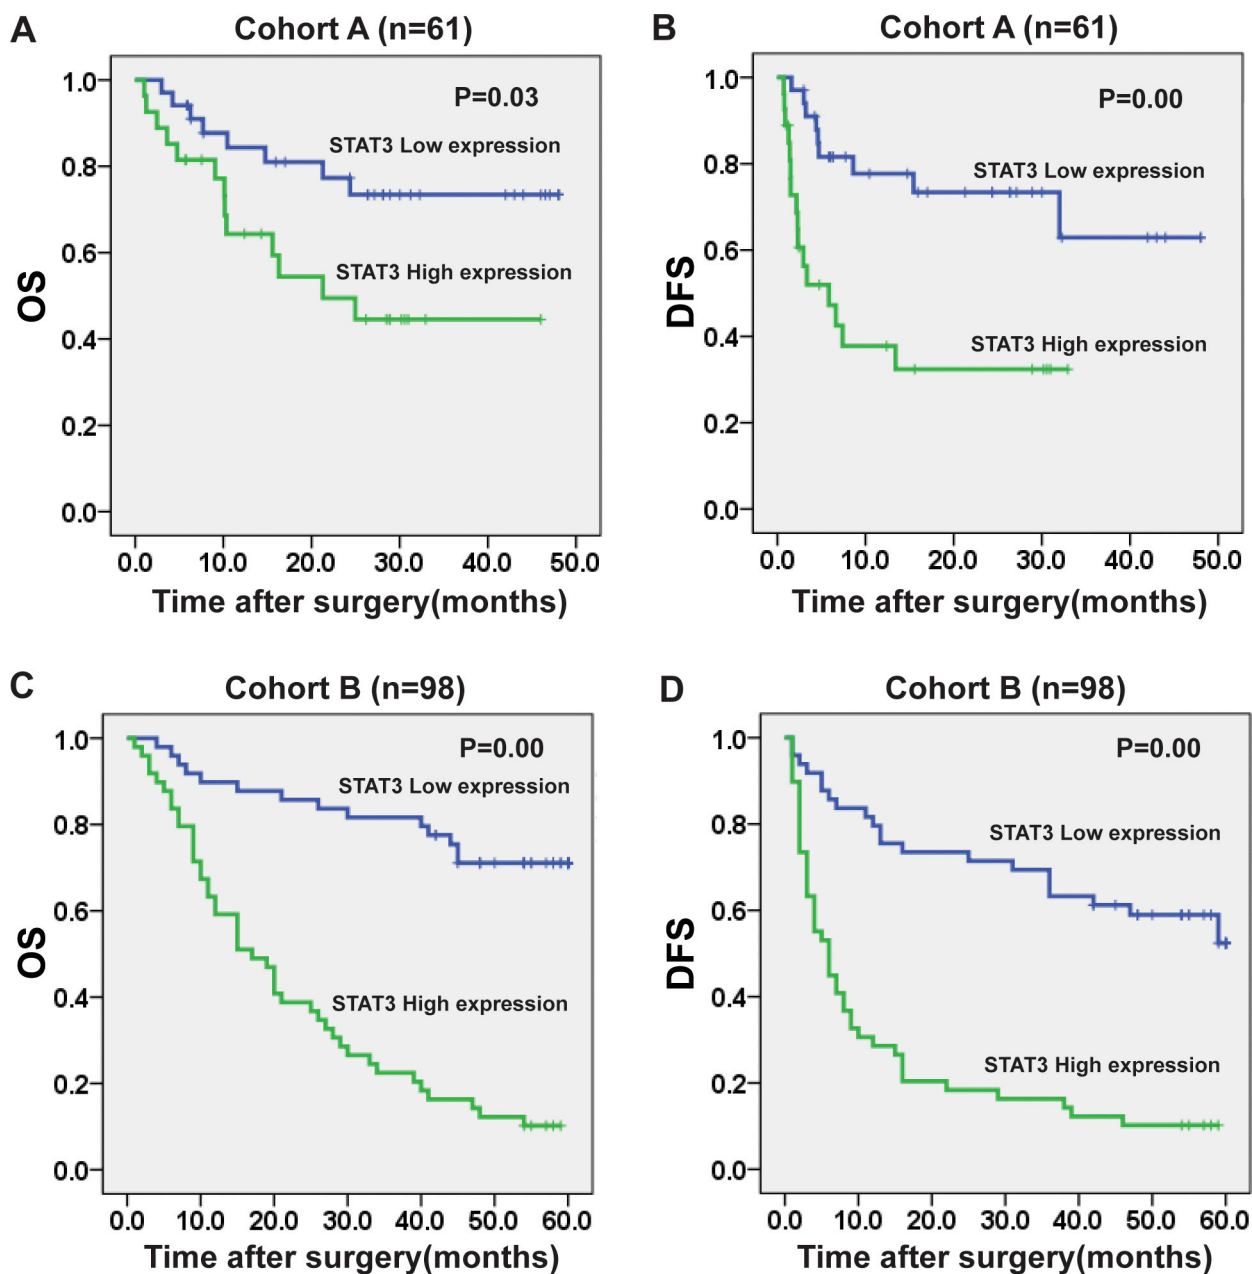

**Supplementary Figure S1: The STAT3 expression are correlated with the prognosis of ICC patients in the two independent cohorts.** (A–B) Kaplan-Meier analysis was conducted to determine the relationship between overall survival (OS) and disease-free survival (DFS) of patients from Cohort A ( $n = 61$ ). Subgroups were plotted according to the scores for the STAT3 levels. (C–D) Kaplan-Meier analysis was conducted to determine the relationship between overall survival (OS) and disease-free survival (DFS) of patients from Cohort B ( $n = 98$ ). Subgroups were plotted according to the scores for the STAT3 levels.
